# Supplementary material
Source: PubMed Central journal article supplement (PMC2799351)
Supplement: pp.109.145078_1.pdf [file pp.109.145078_1.pdf]

**Supplemental information for**  
**MODIFIED VACUOLE PHENOTYPE1 Is an Arabidopsis Myrosinase-Associated**  
**Protein Involved in Endomembrane Protein Trafficking**

April E. Agee, Marci Surpin, Eun Ju Sohn, Thomas Girke, Abel Rosado, Brian W. Kram, Clay Carter, Adam M. Wentzell, Daniel J. Kliebenstein, Hak Chul Jin, Ohkmae K. Park, Hailing Jin, Glenn R. Hicks, Natasha V. Raikhel

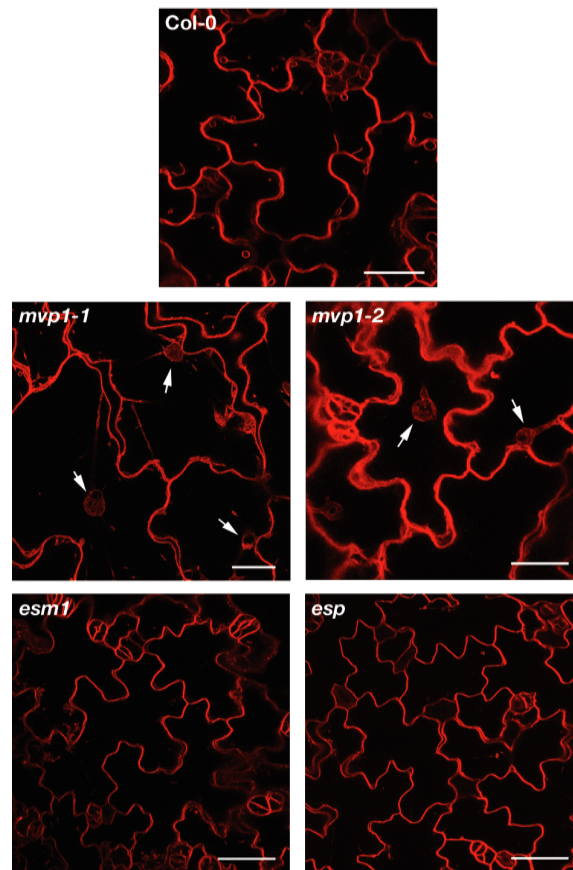

**Figure S1.** *mvp1* mutants contain aggregates in the absence of over-expressed protein fusions, and the *esm1* and *esp* knockout mutants do not exhibit any trafficking defects. Col-0, *mvp1-1* (-GFP), *mvp1-2*, *esm1* and *esp* seedlings were incubated overnight in liquid Arabidopsis growth media supplemented with 10  $\mu$ M FM4-64. The seedlings were then imaged using a laser scanning confocal microscope. The arrows indicate FM4-64-stained perinuclear aggregates. Bars = 32  $\mu$ m.

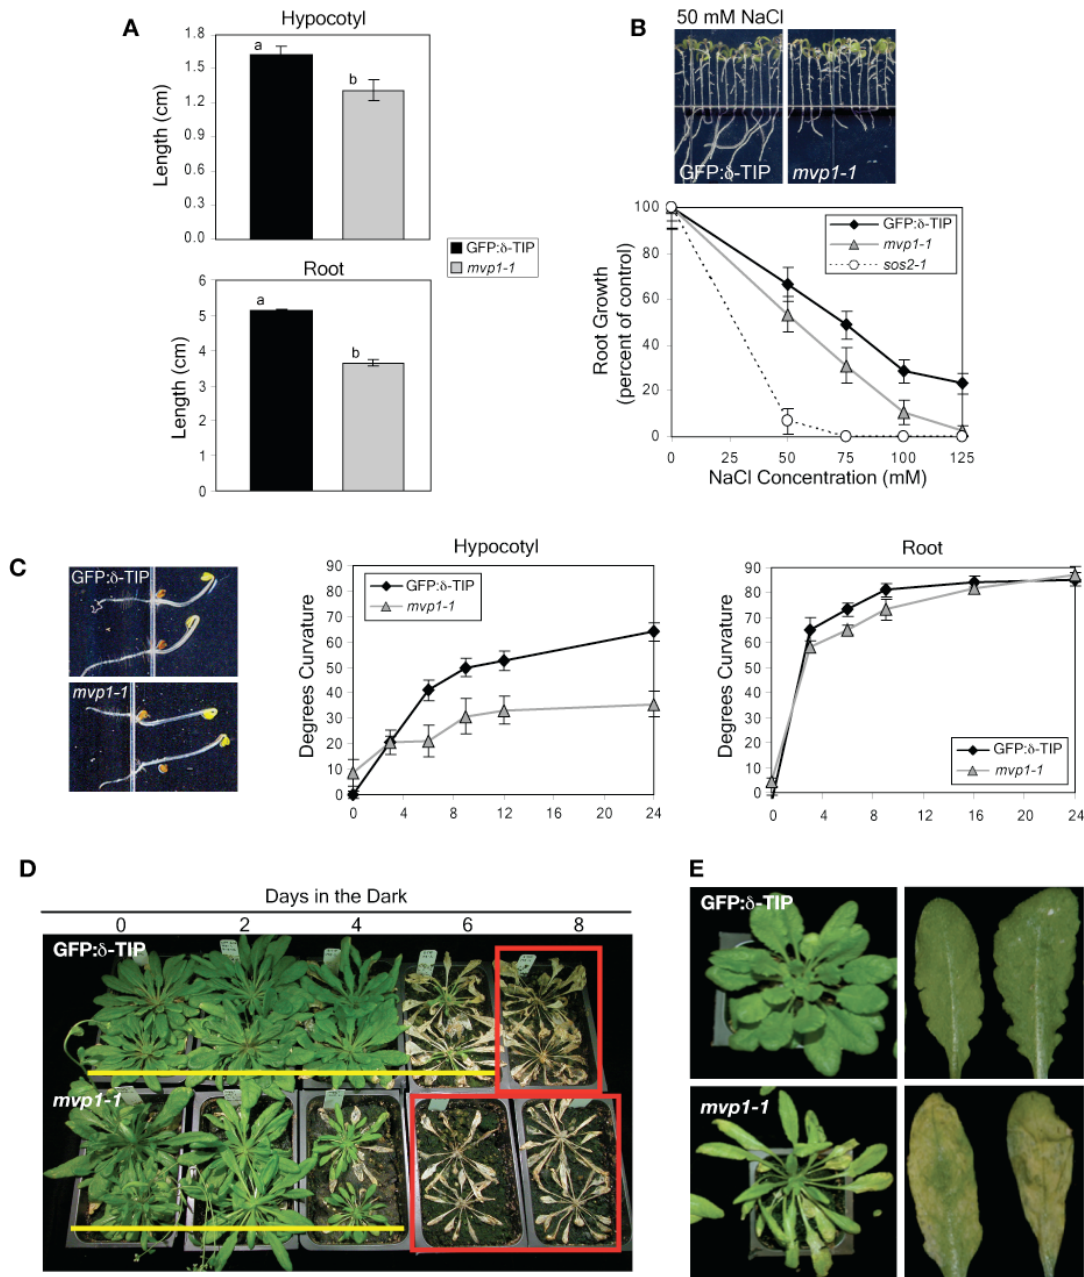

**Figure S2.** Phenotypic analysis indicates that *mvp1-1* mutants have reduced endomembrane functionality. A, Hypocotyl (seven day-old seedlings) and root growth (thirteen day-old seedlings) were both reduced in *mvp1-1* mutants (gray) compared to parental GFP:δ-TIP (black). Statistically significant groupings were designated with letters **a** and **b**, and were determined by a Student's *t*-test. Bars represent standard error. B, Five day-old seedlings were transferred to media supplemented with NaCl (50 mM – 125 mM) for three additional days. Whereas both wild type (black diamonds) and the

---

*mvp1-1* mutant (gray triangles) exhibited reduced growth with increasing NaCl concentrations, the mutant was more severely restricted in growth. Values are reported in percent growth of the untreated control. *salt over-sensitive2* mutants (white circles) were used as a positive control. Bars represent standard error. C, Three day-old etiolated seedlings were rotated clockwise 90° for three hours. Hypocotyl and root tip angles relative to vertical orientation were quantified. Hypocotyl curvature was significantly reduced in *mvp1-1*, but roots responded normally after 24 hours re-orientation. Bars represent standard error. D, Plants were grown for six weeks under short day conditions (8 h light/16 h dark), then placed in complete darkness to inhibit photosynthesis for 0-8 days and allowed to recover for one week. Parental plants recovered after up to six days of darkness (yellow lines), but *mvp1-1* were dead by six days dark treatment (red boxes). E, *mvp1-1* plants were more severely affected than parental GFP:δ-TIP five days post-infection with  $1 \times 10^6$  spores/ml *Alternaria brassicicola*.

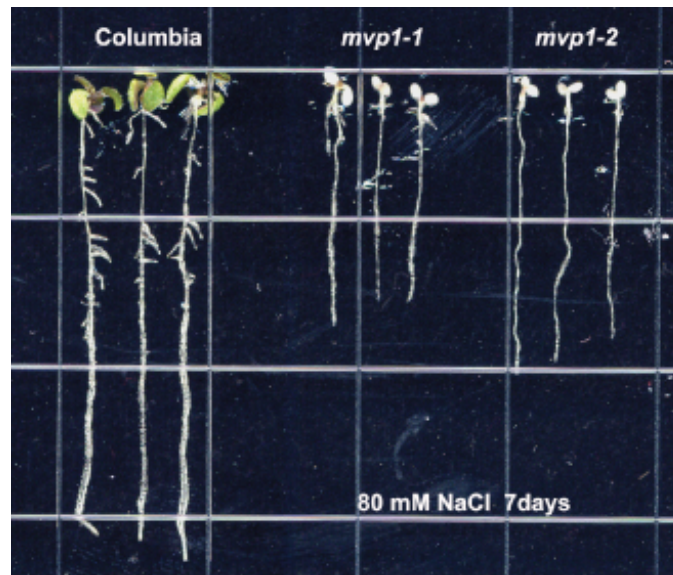

**Figure S3.** The *mvp1-2* insertional allele is sensitive to NaCl treatment. Five day-old seedlings were transferred to media supplemented with 80 mM NaCl for two additional days.

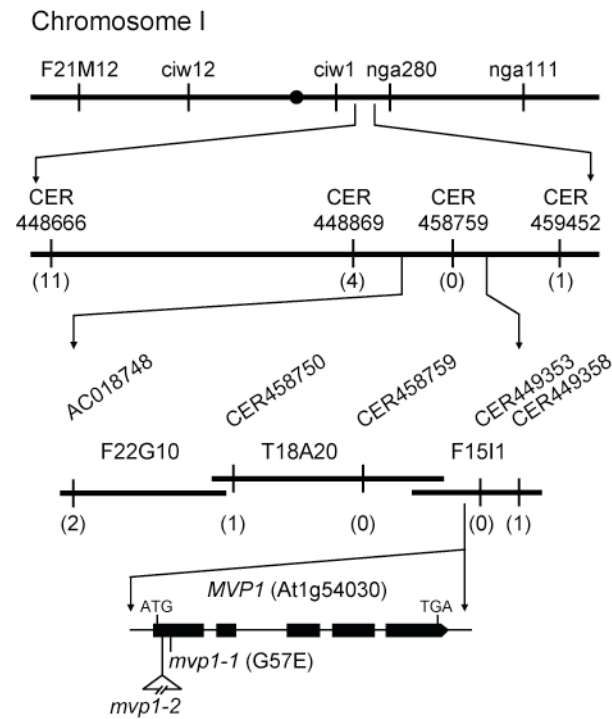

**Figure S4.** Positional cloning of *MVP1*. The approximate map position of the *mvp1-1* mutation on chromosome 1 was delimited by markers *ciw1* and *nga280*. Fine-scale mapping is represented by relative marker positions with the number of recombinants per total number of progeny shown in parentheses. The location of MVP1 on BAC F15I1 is in reference to other BACs in the region. A schematic drawing of *MVP1* shows the *mvp1-1* point mutation in the first exon of At1g54030, and a second insertional allele, *mvp1-2*, also in the first exon.

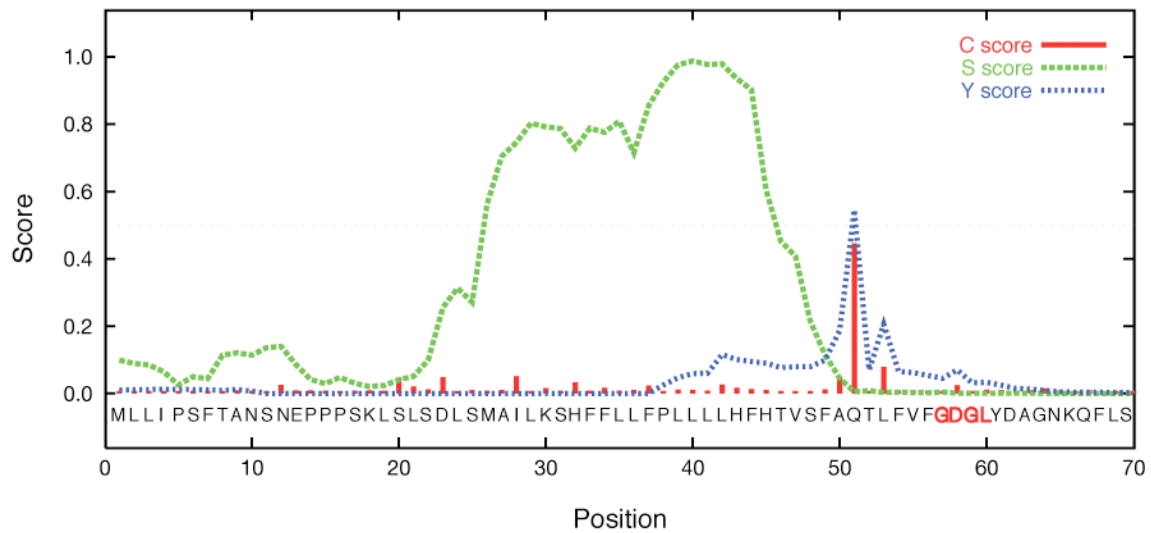

**Figure S5.** MVP1 contains a putative signal peptide for entry into the ER. SignalP 3.0 (Emanuelsson et al., 2007) was used to predict a signal peptide spanning amino acids 27 to 44 of MVP1 (green, S score >0.6) with an 89.7% probability. The most likely signal peptide cleavage site (blue, maximum Y score, indicated by highest C score, red) occurs between positions 50 and 51 (residues SFA-QT) of MVP1. The MVP1 GDGL motif (mvp1-1 = EDGL) is highlighted in bold red letter in the amino acid sequence.



```

AtMVP1      NR--VIKSKTYTFETGNAACCGTGSINGSNCSAKNV----CAKPEEYIFFDGKHLTQEAN
AtESM1      RRIATGRSLNRYRFFVTNTSCCGVGTHNAYGCGKGNVHSLKCEYQRSYFFFDGRHNTEKAQ
At3g14220   RR--INEPSLHGYPDTTTTSCCGTGSRNAYGCGYSNVHAKLCSYQKSFLFFDGRHNTEKTD
At1g54000   TR--TQRNQNFRRFFVTNASCCGVGSHDAYGCGLPNVHSLKCEYQRSFLFFDGRHNSEKAQ
At1g54010   TR--TQRNQNFRRFFVTNASCCGVGTHDAYGCGFPNVHSLKCEYQRSYLFDDGRHNTEKAQ
At1g54020   RR--TQRNMNRYRFSVTNISCCGVGTHYAYGCGLPNVHSLKCEYQRSYLYFDARHNTEKAQ
Bn_iMyAP9   RR--TQRNMNFRFSRTDVSCCGTGTNAYGCGLPNVHSLKCEYQRSYLYFDGRHNSEKAQ
Bn_iMyAP12  RR--TQRNMNFRFSLTNVSCCGTGTNAYGCGLPNVHSLKCEYQRSYLYFDGRHNSEKAQ
Bn_MyAP5    RR--TQRNMNFR-----SHNAFGCGRPNVHSLKCEYQRSYLFDDGRHNSEKAQ
Bn_MyAP4    RR--TQRNMNFRYSFTNVSCCGIGSHNAFGCGRPNVHSLKCEYQRSYLFDDGRHNSEKAQ
              *      .      .      :      .  *.  **      *      . . . . : * . * : : : :

AtMVP1      LQVGHLMWGADPEVIGPNNIRELMVLPLDITVILAGIQEAMAAMRPROSNIESLYDIKKM
AtESM1      EEMAHLLYGADPDVVQPMTVRELIVYPTGETM-----REYW-EPNNLAIRRRPS----
At3g14220   EEVANLFYSGDKHVSPMNIKDLVGKAATDLL-----AQ-----
At1g54000   EMFAHLLFGADTNVVQPMNVRELTVYPVDEPM-----REFWVPPTPATVHA-----
At1g54010   EMFGHLLFGADTNVIQPMNIRELVVYPADPEM-----RESWVPPTSATVQL-----
At1g54020   EAFHLLIFGADPNVIQPMNVRELMVYPVNEPM-----REFWEDPMDEKLSLVQY----
Bn_iMyAP9   ESFAHLLFGADPNVIQPMNIRELITYPVNTNM-----TEVWKEPVEKNSSLVHD----
Bn_iMyAP12  ESFAHLLFGADPNVIQPMNIRELITYPVNTNM-----SEFWKEPVERNLSSLVHD----
Bn_MyAP5    EQFAHLLFGANPNVIQPMNIRELITYPVNTNM-----SEFWKEPVGRNLLLVHE----
Bn_MyAP4    EQFAHLLFGANPNVIQPMNIRELITYPVNTNM-----SEFWKEPVGRNLLLVHE----
              . . : * : : : : . * : * : : : *      .      :

AtMVP1      ESEMDNHWLYQVDKAISF-M--I
AtESM1      -----RDFYLGL---AAYY
At3g14220   -----E-I
At1g54000   -----SDSSSSTSRGYEYY
At1g54010   -----RESRGY-----EYY
At1g54020   -----
Bn_iMyAP9   -----NVVSASES-----M
Bn_iMyAP12  -----NVVSASES-----M
Bn_MyAP5    -----YDVNASVS-----T
Bn_MyAP4    -----YDVNASVS-----T

```

**Figure S6.** Sequence alignment of putative myrosinase-associated proteins from *Arabidopsis* and oilseed rape. The sequence alignment was generated using T-Coffee v6.85 (Notredame et al., 2000, Dereeper et al., 2008). The symbols underneath the alignment signify: (\*) all residues identical; (:) conserved substitutions; (.) semi-conserved substitutions. The GDSL lipase motifs are shaded gray. Glycine 57 from MVP1, which is converted to glutamic acid in the *mvp1-1* allele, is designated with an arrow (↓). The catalytic serine residue, which is a glycine in the MVP1 protein, is designated with a star (★).

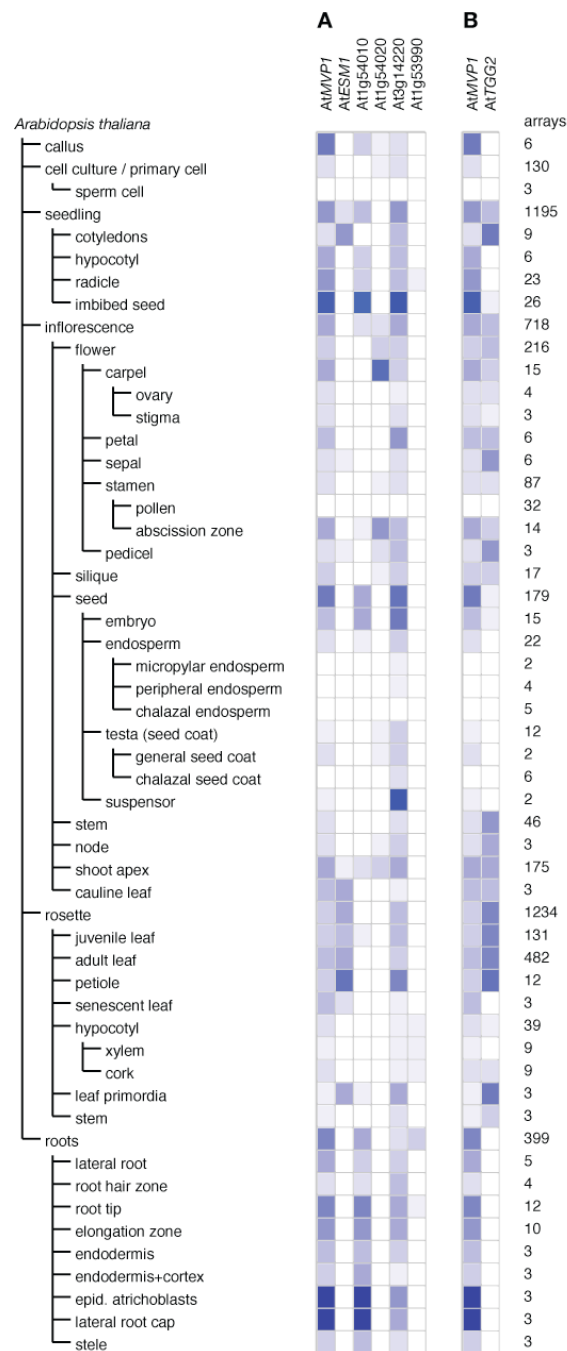

**Figure S7.** *MVPI* is expressed across many *Arabidopsis* tissues. The Genevestigator V3 reference expression database (Hruz et al., 2008) and analysis tool shows relative levels of mRNA accumulation in specific tissues based on the given numbers of microarrays. *MVPI* is expressed at low to moderate levels throughout most tissues except sperm cells,

---

pollen, endosperm and chalazal seed coat. A, Other members of the vacuolar *MVP1* clade are included for comparison. B, Comparison of the *MVP1* and *TGG2* expression patterns.

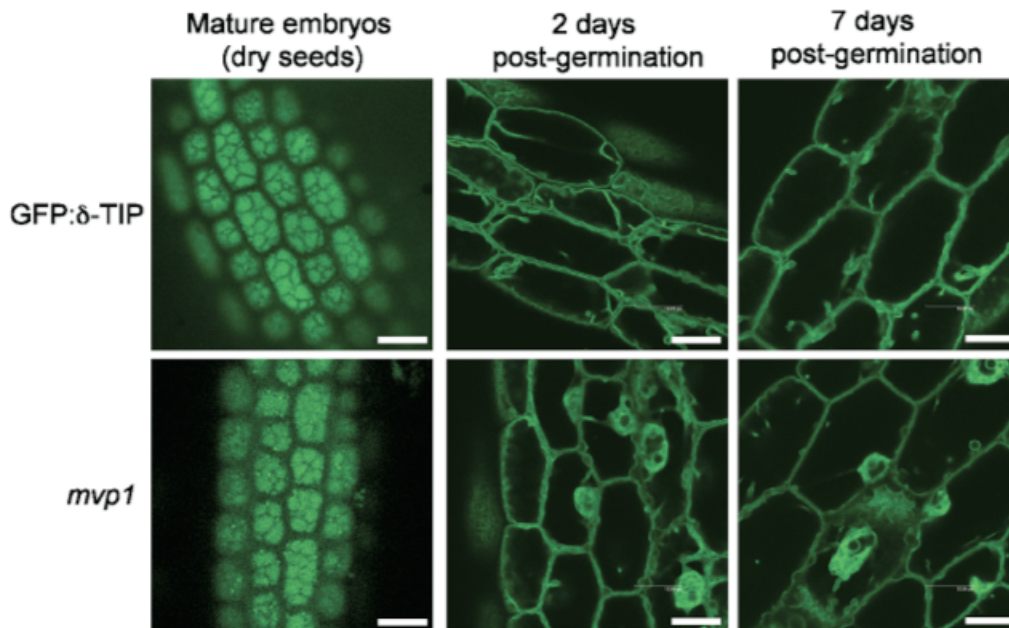

**Figure S8.** GFP aggregates appear early in *mvp1* seedling development. In mature *mvp1* embryos, although central vacuoles are not yet formed, unusual punctate structures are visible amongst the diffuse pattern of GFP fluorescence. Although these small compartments have not yet been identified, the altered GFP:δ-TIP localization in embryonic tissue points to a fundamental role of MVP1 in formation of the vacuole. The importance of MVP1 in vacuole biogenesis was emphasized further with the observation of characteristic *mvp1* aggregates as early as two days after germination in hypocotyl tissues of young seedlings. Thus, MVP1 is necessary for proper development of the vacuole in non-germinated seeds and immediately after germination in formation of the large central vacuole. Bars = 16  $\mu$ m.

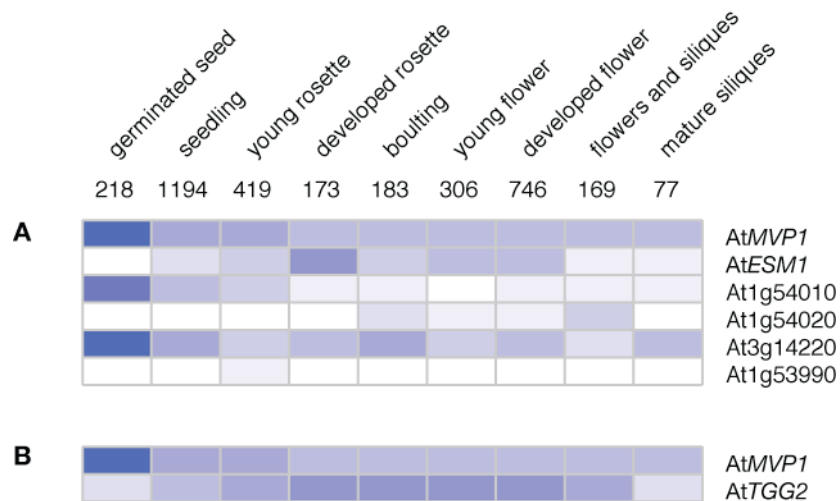

**Figure S9.** *MVP1* is expressed throughout development. Developmental patterns of gene expression for *MVP1* and its vacuolar relatives were analyzed with the Genevestigator V3 (Hruz et al., 2008) reference expression database and analysis tool. A, *MVP1* is expressed at moderate levels throughout the plant life cycle, most highly in early development in germinated seed and seedlings. B, Comparison with *TGG2* expression. Both genes are expressed throughout the development of the plant, with *MVP1* at higher levels early in development, and *TGG2* increasing in transcript levels through the flowering phase.

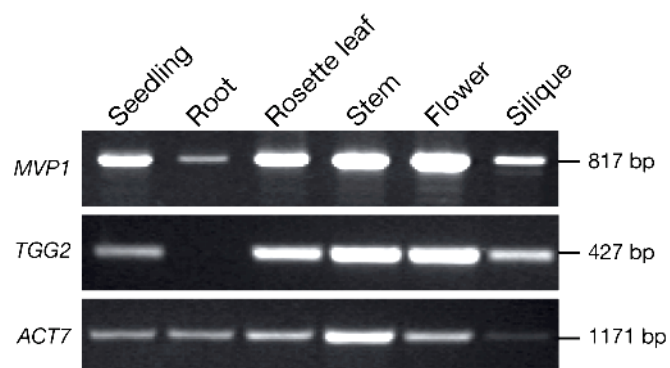

**Figure S10.** RT-PCR to confirm Genevestigator data. RT-PCR was carried out using 100 ng total RNA isolated from designated Col-0 tissues.

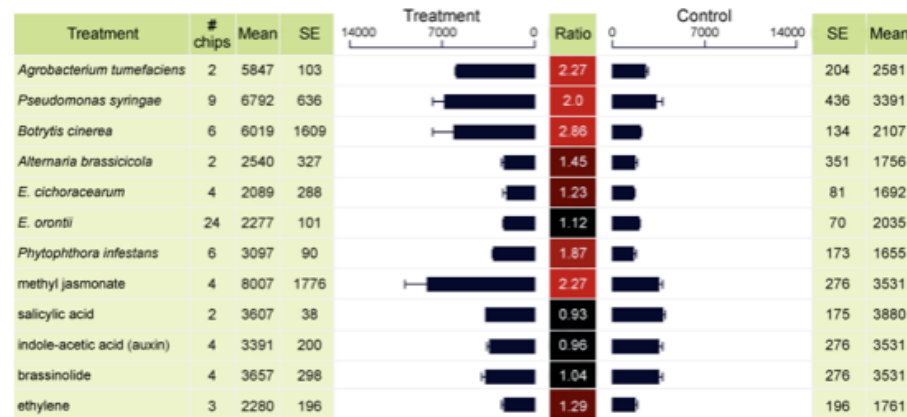

**Figure S11.** *MVPI* expression is induced by pathogens and methyl jasmonate. Genevestigator V2 (Zimmermann et al., 2004) was used to examine changes in *MVPI* gene expression after treatment with pathogens and hormones. The bacterial pathogens *Agrobacterium tumefaciens* and *Pseudomonas syringae* led to greater than two-fold inductions in *MVPI* transcript. *MVPI* was also induced by the fungal necrotrophs *Botrytis cinerea* and *Alternaria brassicicola*, and oomycete *Phytophthora infestans*, but the biotrophic powdery mildews *Erysiphe cichoracearum* and *Erysiphe orontii* had little or no effect on *MVPI* in these arrays. *MVPI* transcription was unaffected by salicylic acid, by the synthetic auxin indole-acetic acid or by brassinolide, but was highly induced by methyl jasmonate and moderately reduced by ethylene.

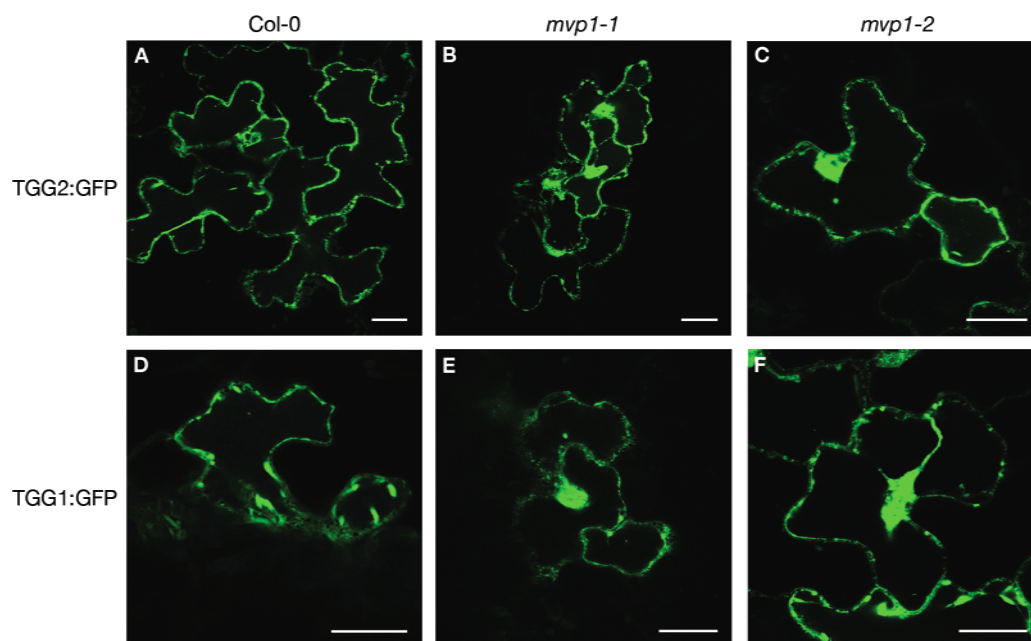

**Figure S12.** Both the *mvp1-1* point mutation and *mvp1-2* insertional mutation impede delivery of TGG2:GFP and TGG1:GFP to the vacuole and accumulate the protein fusion in perinuclear aggregates. Bars = 20 μm.

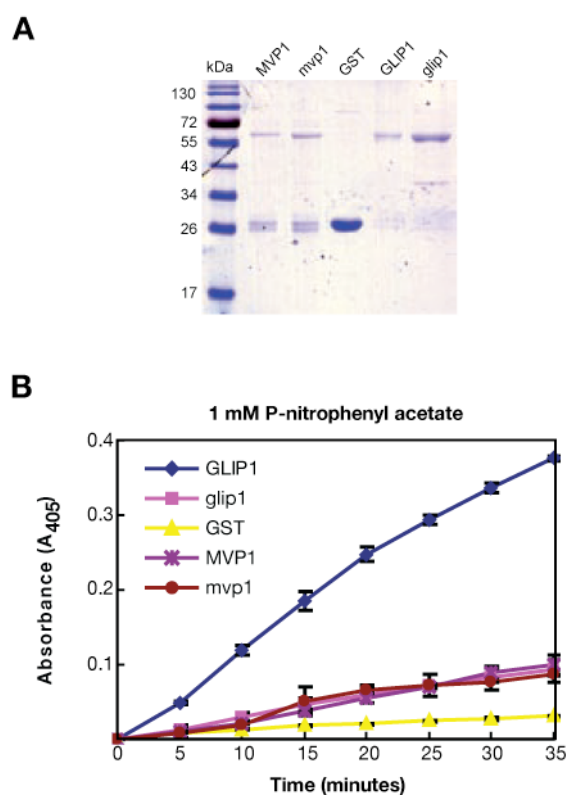

**Figure S13.** MVP1 does not act as a GDSL lipase. A, SDS-PAGE gel stained with Coomassie Blue showing purified recombinant GST-tagged proteins used in lipase activity assay. B, Absorbance at 405 nm was used to measure hydrolysis of 1 mM *P*-nitrophenyl acetate over time by 1  $\mu$ g GLIP1, glip1 and GST, or 5  $\mu$ g MVP1 and mvp1-1 proteins. Each data point represents the average of three independent measurements with corresponding error bars. GLIP1 = GDSL LIPASE 1 (Oh et al., 2005).

**Supplemental Table 1. Primers Used for Fine Mapping of *mvp1-1*.**

| <b><u>Primer</u></b> | <b><u>Sequence (5' → 3')</u></b> | <b><u>BAC</u></b> | <b><u>Polymorphism</u></b> |
|----------------------|----------------------------------|-------------------|----------------------------|
| CER448666 L          | TTGGAATGAGGATTTGATTCG            | F11M15            | Indel                      |
| CER448666 R          | TTGTAGGGGAGAATGGAACC             | F11M15            |                            |
| CER448869 L          | GCGTGGTTTCGTTTCTTCTC             | F12M16            | Indel                      |
| CER448869 R          | TGGTTCAATACAAAGAACATCCA          | F12M16            |                            |
| CER459452 L          | CCGGATCCAAAACAGAAAAA             | T22H22            | Indel                      |
| CER459452 R          | AGGGAGGCTCATCTCCCTAT             | T22H22            |                            |
| AC018748 L           | AGCAGGCAAAATGAGACTTCC            | T3F20             | Indel                      |
| AC018748 R           | TTTCACCCTTGCTGCCTTAT             | T3F20             |                            |
| CER458750 L          | GCATTACTGGCACACCAAGA             | T18A20            | Indel                      |
| CER458750 R          | GCGAATTCCATTGACCAAGT             | T18A20            |                            |
| CER458759 L          | CCCAATTAAAAGGCCAATCA             | T18A20            | Indel                      |
| CER458759 L          | AAGAAGCAAAACAAATTCCAGT           | T18A20            |                            |
| CER449353 L          | AACTCGCAGCAGCTACAACA             | F15I1             | Indel                      |
| CER449353 R          | ACATTTCCGCTTGCTTGTTT             | F15I1             |                            |
| CER449358 L          | GGCAAGAATAACGGCAATGT             | F15I1             | Indel                      |
| CER449358 R          | TTGCCCATGTTTAAGACAAGAA           | F15I1             |                            |

**Supplemental Table 2. Primers Used to Create GFP Fusion Constructs.**

|           |                                                      |
|-----------|------------------------------------------------------|
| MVP1_F    | GGGGACAAGTTTGTACAAAAAAGCAGGCTYYATGCTTTTGATACCTTCCTTC |
| MVP1_NT_R | GGGGACAAGTTTGTACAAAAAAGCAGGCTYYATGAAGCTTCTTATGCTCGC  |
| TGG1_F    | GGGGACAAGTTTGTACAAAAAAGCAGGCTYYATGAAGCTTCTTATGCTCGC  |
| TGG1-R_NT | GGGGACCACTTTGTACAAGAAAGCTGGGTNTGCATCTGCAAGACTCTTCCG  |
| TGG2-F    | GGGGACAAGTTTGTACAAAAAAGCAGGCTYYATGAAGCTTCTTGCGTTCGC  |
| TGG2-R_NT | GGGGACCACTTTGTACAAGAAAGCTGGGTNTGTGAGGCTCTTCCTATCCCC  |

**Supplemental Table 3. Primers Used for RT-PCR**

|           |                       |
|-----------|-----------------------|
| MVP1 RT F | CTTCCCTCTTCTTCTTCTCCA |
| MVP1 RT R | CGTTGATAGAGCCAGTTCCA  |
| TGG2 RT F | AACTTGGAGGGCCAAAGAAT  |
| TGG2 RT R | ATGCTTCGGTGAAGGGTATG  |
| ACT7 RT F | AAAATGGCCGATGGTGAGG   |
| ACT7 RT R | ACTCACCACCACGAACCAG   |

**Supplemental Table 4. Percent Sequence Identity Amongst Putative Myrosinase-Associated Proteins.**

|                     | Atlg53990 | Atlg54000 | MVP1<br>(Atlg54030) | Atlg54010 | At3g14220 | ESM1<br>(At3g14210) | Atlg54020 | Bn<br>MyAP12 | Bn<br>MyAP9 | Hb<br>HevB4 | Hb<br>HevB4 | Bn<br>MyAp5 | Bn<br>MyAp4 |
|---------------------|-----------|-----------|---------------------|-----------|-----------|---------------------|-----------|--------------|-------------|-------------|-------------|-------------|-------------|
| Atlg539901          | 100       | 30.65     | 34.40               | 30.32     | 31.17     | 30.40               | 23.90     | 30.24        | 29.63       | 33.93       | 33.93       | 30.75       | 26.50       |
| Atlg540001          | 30.65     | 100       | 37.35               | 87.47     | 41.88     | 68.01               | 52.94     | 67.26        | 66.75       | 30.10       | 30.10       | 65.55       | 66.46       |
| MVP1<br>(Atlg54030) | 34.40     | 37.35     | 100                 | 38.00     | 36.05     | 36.72               | 27.95     | 35.92        | 34.88       | 33.88       | 33.88       | 33.57       | 30.42       |
| Atlg54010           | 30.32     | 87.47     | 38.00               | 100       | 43.19     | 68.43               | 54.40     | 68.12        | 67.87       | 31.50       | 31.75       | 66.32       | 66.77       |
| At3g14220           | 31.17     | 41.88     | 36.05               | 43.19     | 100       | 46.97               | 33.07     | 44.22        | 42.67       | 34.46       | 34.46       | 41.60       | 42.14       |
| At3g14210           | 30.40     | 68.01     | 36.72               | 68.43     | 46.97     | 100                 | 53.71     | 65.90        | 64.38       | 31.03       | 31.03       | 60.81       | 51.66       |
| Atlg54020           | 23.90     | 52.94     | 27.95               | 54.40     | 33.07     | 53.71               | 100       | 77.27        | 75.87       | 24.87       | 24.87       | 71.78       | 74.22       |
| Bn MyAP12           | 30.24     | 67.26     | 35.92               | 68.12     | 44.22     | 65.90               | 77.27     | 100          | 94.78       | 30.83       | 30.83       | 80.42       | 82.80       |
| Bn MyAP9            | 29.63     | 66.75     | 34.88               | 67.87     | 42.67     | 64.38               | 75.87     | 94.78        | 100         | 29.85       | 29.85       | 78.59       | 80.57       |
| Hb HevB4            | 33.93     | 30.10     | 33.88               | 31.50     | 34.46     | 31.03               | 24.87     | 30.83        | 29.85       | 100         | 99.73       | 30.60       | 26.76       |
| Hb HevB4            | 33.93     | 30.10     | 33.88               | 31.75     | 34.46     | 31.03               | 24.87     | 30.83        | 29.85       | 99.73       | 100         | 30.60       | 26.76       |
| Bn MyAp5            | 30.75     | 65.55     | 33.57               | 66.32     | 41.60     | 60.81               | 71.78     | 80.42        | 78.59       | 30.60       | 30.60       | 100         | 96.18       |
| Bn MyAp4            | 26.50     | 66.46     | 30.42               | 66.77     | 42.14     | 51.66               | 74.22     | 82.80        | 80.57       | 26.76       | 26.76       | 96.18       | 100         |

---

## Supplemental Materials and Methods

### Gravitropism Assays

Seedlings were grown in the dark as previously described for 48-72 hours (Surpin et al., 2005), then scanned with a flatbed scanner at 1200 dpi. The degree of reorientation from the vertical (90°) was measured using the ImageJ software package (Abramoff et al., 2004).

### Carbon limitation Assays

Plants were grown on soil for six weeks under short conditions (8 h light/16 h dark), and then placed in darkness for 0, 2, 4, 6 or 8 days (Thompson et al., 2005). Plants recovered under short-day conditions for one week, and were then photographed using a commercial digital camera.

### Abiotic Stress Sensitivity

Root elongation measurements were performed as previously described (Rosado et al., 2006). Briefly, five day-old vertically grown seedlings were transferred from standard growth media to media supplemented with different concentrations of NaCl for three additional days. *salt overly sensitive 2 (sos2-1)* seedlings were included as a positive control (Zhu et al., 1998). Increases in root length were measured using ImageJ software (Abramoff et al., 2004).

### Pathogen Sensitivity Assays

*Alternaria brassicicola* spores were suspended in deionized water and diluted to a concentration of  $1 \times 10^6$  spores per ml for spray inoculation of 35 day-old *Arabidopsis* plants that were grown under eight hours of light (short day conditions). Plants were then grown in 100% relative humidity for three days with short day light cycles.

*Hyaloperonospora parasitica* isolates Emoy2 and Noco2 were used to inoculate seven day-old seedlings as described previously with a spore suspension of  $5 \times 10^4$  spores per ml in deionized (Knoth and Eulgem, 2008). Plants were infected with suspensions of

---

*Pseudomonas syringae* pv. *tomato* DC3000 carrying either an empty vector or expressing the avirulence genes *avrRpt2* or *avrRpm1* ( $2 \times 10^5$  colony forming units per ml in deionized water) by infiltration as described (Rojo et al., 2004).

### **Tissue-Specific RT-PCR Assays**

Total RNA was isolated using the RNEasy Mini Kit (Qiagen, Inc.) and the isolation protocol for plants. RNA was purified from the following tissues, all harvested from Col-0 plants that were grown using standard long-day conditions: two week-old seedlings, four week-old roots and rosette leaves, and six week old-inflorescence stems, flowers and green siliques. RT-PCR was carried out using a One-Step RT-PCR kit (Qiagen, Inc.) and the primers described in Supplemental Table 3. The PCR was carried out using 26 cycles for *TGG2* and *ACT7*, and 30 cycles for *MVPI*.

---

**Supplemental References**

**Abramoff MD, Magelhaes PJ, and Ram SJ** (2004) Image processing with imageJ. *Biophotonics International* **11**: 36-42

**Dereeper A, Guignon V, Blanc G, Audic S, Buffet S, Chevenet F, Dufayard JF, Guindon S, Lefort V, et al.** (2008) Phylogeny.fr: Robust phylogenetic analysis for the non-specialist. *Nucleic Acids Res* **36**: W465-W469

**Emanuelsson O, Brunak S, von Heijne G, and Nielsen H** (2007) Locating proteins in the cell using TargetP, SignalP and related tools. *Nat Protoc* **2**: 953-971

**Hruz T, Laule O, Szabo G, Wessendorp F, Bleuler S, Oertle L, Widmayer P, Gruissem W, and Zimmermann P** (2008) Genevestigator V3: A reference expression database for the meta-analysis of transcriptomes. *Adv Bioinform* 420-747

**Knoth C, and Eulgem T** (2008) The oomycete response gene *LURP1* is required for defense against *Hyaloperonospora parasitica* in *Arabidopsis thaliana*. *Plant J* **55**: 53-64

**Notredame C, Higgins DG, and Heringa J** (2000) T-Coffee: A novel method for fast and accurate multiple sequence alignment. *J Mol Biol* **302**: 205-217

**Oh IS, Park AR, Bae MS, Kwon SJ, Kim YS, Lee JE, Kang NY, Lee S, Cheong H, and Park OK** (2005) Secretome analysis reveals an *Arabidopsis* lipase involved in defense against *Alternaria brassicicola*. *Plant Cell* **17**: 2832-2847

---

**Rojo E, Martín R, Carter C, Zouhar J, Pan S, Plotnikova J, Jin H, Paneque M,**

**Sánchez-Serrano JJ, et al.** (2004) Vpey exhibits a caspase-like activity that contributes to defense against pathogens. *Curr Biol* **14**: 1897-1906

**Surpin M, Rojas-Pierce M, Carter C, Hicks GR, Vasquez J, and Raikhel NV** (2005)

The power of chemical genomics to study the link between endomembrane system components and the gravitropic response. *Proc Natl Acad Sci U S A* **102**: 4902-4907

**Thompson AR, Doelling JH, Suttangkakul A, and Vierstra RD** (2005) Autophagic

nutrient recycling in Arabidopsis directed by the ATG8 and ATG12 conjugation pathways. *Plant Physiol* **138**: 2097-2110

**Zhu JK, Liu J, and Xiong L** (1998) Genetic analysis of salt tolerance in Arabidopsis.

Evidence for a critical role of potassium nutrition. *Plant Cell* **10**: 1181-1191

**Zimmermann P, Hirsch-Hoffmann M, Hennig L, and Gruissem W** (2004)

GENEVESTIGATOR. Arabidopsis microarray database and analysis toolbox. *Plant Physiol* **136**: 2621-2632
